# Supplementary material
Source: MDPI journal article supplement (https://www.mdpi.com/2311-5629/9/3/77)
Supplement: s1 [file s1]

# Effect of Cu on performance of self-dispersing Ni-catalyst in production of carbon nanofibers from ethylene

Sofya D. Afonnikova<sup>1</sup>, Yury I. Bauman<sup>1</sup>, Vladimir O. Stoyanovskii<sup>1</sup>, Mikhail N. Volochaev<sup>2</sup>, Ilya V. Mishakov<sup>1,\*</sup>, Aleksey A. Vedyagin<sup>1</sup>

<sup>1</sup> Borekov Institute of Catalysis SB RAS, 5 Lavrentyev Ave., Novosibirsk 630090, Russia; mishakov@catalysis.ru, afonnikova@catalysis.ru, bauman@catalysis.ru, stoyanovskii@catalysis.ru, vedyagin@catalysis.ru

<sup>2</sup> Kirensky Institute of Physics, Akademgorodok, 50/38, Krasnoyarsk 660036, Russia; volochaev91@mail.ru

\* Correspondence: mishakov@catalysis.ru

**Table S1.** Particle size distribution data for Ni-Cu alloy. Diameter of the milling balls = 5 mm, activation time = 5 min.

| Sample | Fraction of certain size particles, % |                        |                         |
|--------|---------------------------------------|------------------------|-------------------------|
|        | 1 - 30 $\mu\text{m}$                  | 30 - 100 $\mu\text{m}$ | 100 - 300 $\mu\text{m}$ |
| Ni-Cu  | 25                                    | 71                     | 4                       |

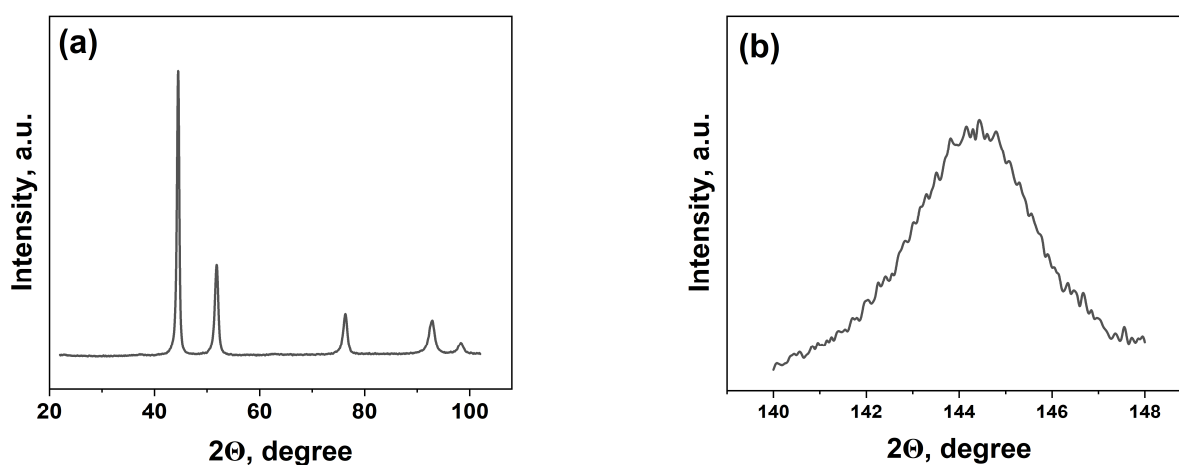

**Figure S1.** XRD patterns of the pristine Ni-Cu alloy in different regions of  $2\theta$ : (a) –  $2\theta = 20-100^\circ$ ; (b) –  $2\theta = 140-148^\circ$ .

**Table S2.** Phase compositions and the lattice parameters for the Ni and Ni-Cu samples. XRD data.

| Sample | Lattice parameter, $\text{\AA}$ | Phase composition |
|--------|---------------------------------|-------------------|
| Ni     | 3.525                           | Fcc of Ni         |
| Ni-Cu  | 3.531                           | Ni-Cu alloy       |
